# Supplementary material
Source: PubMed Central journal article supplement (PMC4268014)
Supplement: NIHMS640533-supplement-21.pdf [file NIHMS640533-supplement-21.pdf]

## **Supplementary Material**

*Solhjo and O'Rourke. Mitochondrial Instability during Regional Ischemia-Reperfusion Underlies Arrhythmias in Monolayers of Cardiomyocytes JMCC 2014*

### **List of Supplemental Movies:**

**Movie 1.** Loss of mitochondrial inner membrane potential during ischemia in 2 phases. Taken using the 40X objective lens.

**Movie 2.** Wave of mitochondrial inner membrane potential loss during ischemia. Taken using the 2X objective lens.

**Movie 3.** Mitochondrial instability upon reperfusion (continuation of experiment shown in Movie 1). Taken using the 40X objective lens.

**Movie 4.** Wave of mitochondrial inner membrane potential loss initiating 2 hours after the onset of reperfusion. Movie shows 5 hours of reperfusion. Taken using the 2X objective lens.

**Movie 5.** Propagation of excitation wave through the monolayer prior to coverslip placement.

**Movie 6.** Ischemia shortens the wavelength and slows conduction. Recorded at 11 min of ischemia.

**Movie 7.** At 1 hour ischemia, the excitation wave travels around the inexcitable ischemic region.

**Movie 8.** Wavelets and reentry. Recorded at 1 min reperfusion.

**Movie 9.** Micro-reentries. Recorded at 3 min reperfusion.

**Movie 10.** Sustained reentry anchored on the border zone. Recorded at 10 min reperfusion.

**Movie 11.** Recovery of excitability in the presence of 4'-Cl-DZP. Recorded at 2 min reperfusion.

## Supplementary Material

Solhjo and O'Rourke. Mitochondrial Instability during Regional Ischemia-Reperfusion Underlies Arrhythmias in Monolayers of Cardiomyocytes JMCC 2014

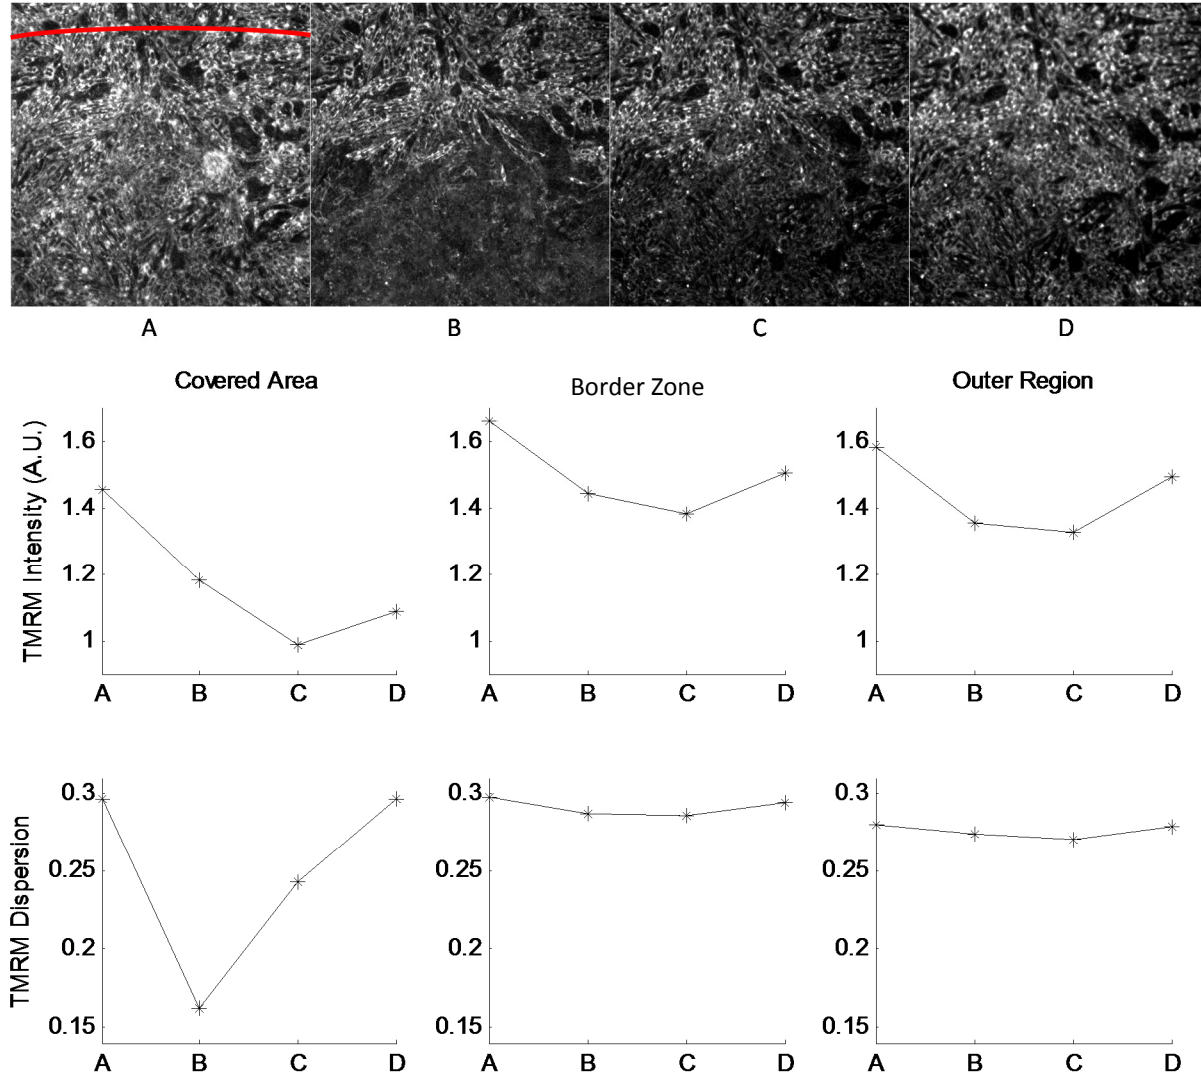

**Supplemental Figure 1. Dispersion of TMRM fluorescence was used, instead of intensity, as a measure of  $\Delta\Psi_m$ .** Loss of mitochondrial  $\Delta\Psi_m$ , due to ischemia, leads to release of TMRM out of matrix and a decrease in dispersion. Reperfusion redistributes TMRM into the mitochondrial matrix, which is shown by an increase in dispersion. TMRM spatial dispersion is used as  $\Delta\Psi_m$  cannot be shown by the changes in TMRM intensity. Dispersion in border zone and the outer region does not change during the IR protocol. The same experiment as Figure 1; **A**: Beginning of ischemia, **B**: beginning of reperfusion, **C**: 45 minutes of reperfusion, **D**: 2 hours of reperfusion.

## Supplementary Material

Solhjo and O'Rourke. Mitochondrial Instability during Regional Ischemia-Reperfusion Underlies Arrhythmias in Monolayers of Cardiomyocytes JMCC 2014

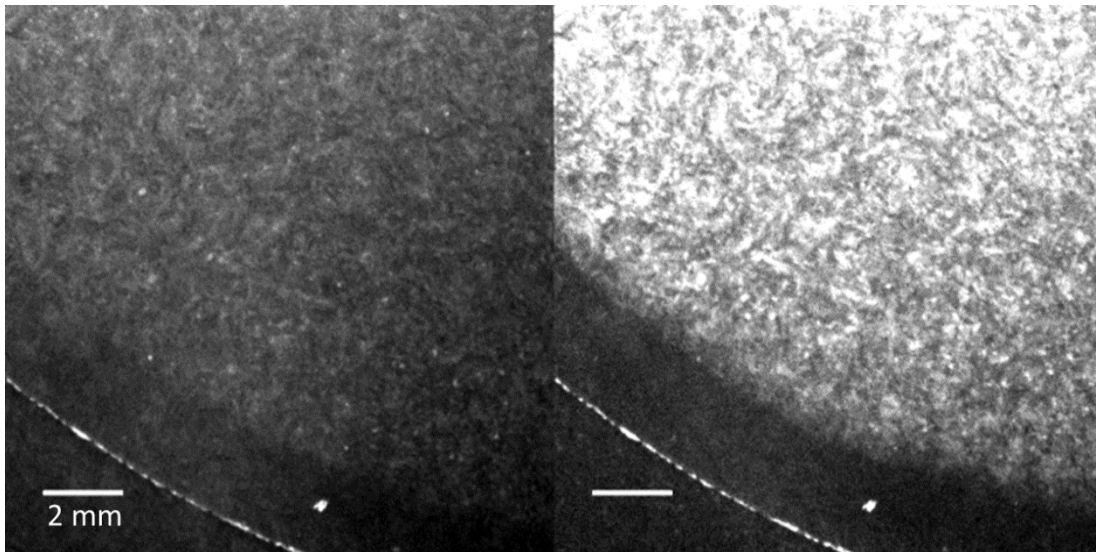

**Supplemental Figure 2.  $\Delta\Psi_m$  at 5 minutes and 1 hour of ischemia.** Loss of  $\Delta\Psi_m$  in the ischemic zone during ischemia is shown here. The white curved line on the lower left of the images shows the edge of the coverslip; the part below the line is not covered. Horizontal line shows 2 mm. Mitochondria in a border zone of approximately 2 mm stayed polarized. **Left image:** 5 minutes after coverslip placement. Partial mitochondrial depolarization can be seen in the ischemic region. **Right image:** Mitochondria of the ischemic region are depolarized after 1 hour of ischemia. (TMRM 2  $\mu\text{mol/l}$ ; dequench mode: in this mode, the TMRM concentration in the mitochondrial matrix exceeds a critical level above which its fluorescence self-quenches. Consequent depolarization of  $\Delta\Psi_m$  is then indicated by an increase in fluorescence due to dequenching.)

## Supplementary Material

Solhjo and O'Rourke. Mitochondrial Instability during Regional Ischemia-Reperfusion Underlies Arrhythmias in Monolayers of Cardiomyocytes JMCC 2014

**A**

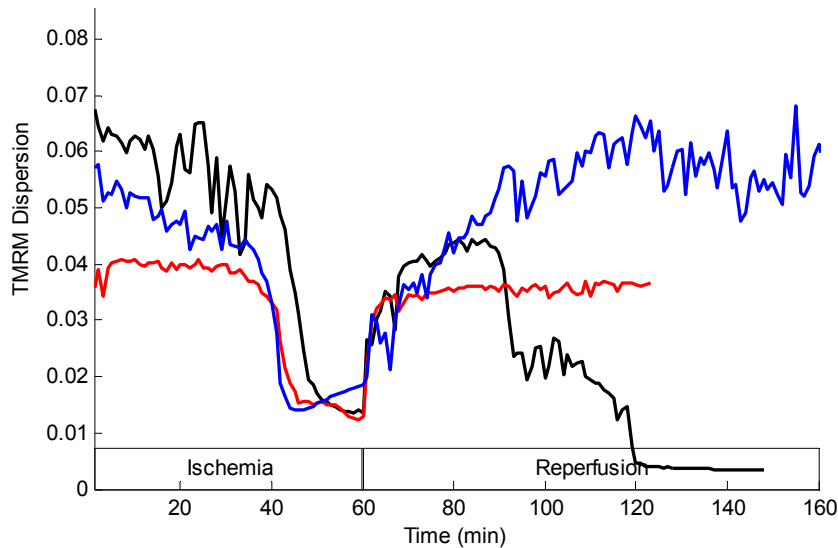

**B**

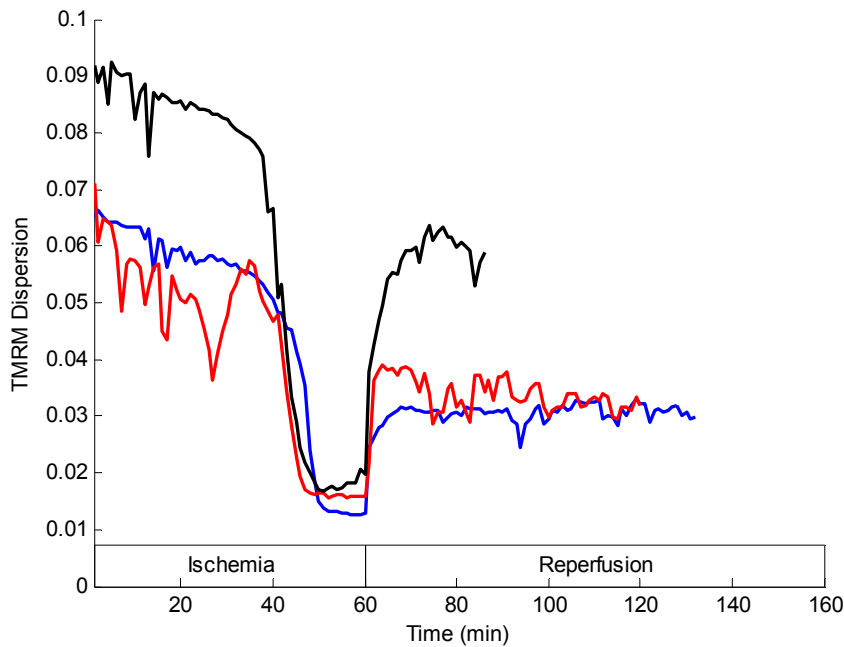

**Supplemental Figure 3. Representative traces of IR induced changes in TMRM dispersion in control and in the presence of 4'-Cl-DZP.** Changes in TMRM dispersion during IR is shown for 3 control monolayers (A), and 3 monolayers in the presence of 16  $\mu$ M 4'-Cl-DZP (B).

## Supplementary Material

Solhjo and O'Rourke. Mitochondrial Instability during Regional Ischemia-Reperfusion Underlies Arrhythmias in Monolayers of Cardiomyocytes JMCC 2014

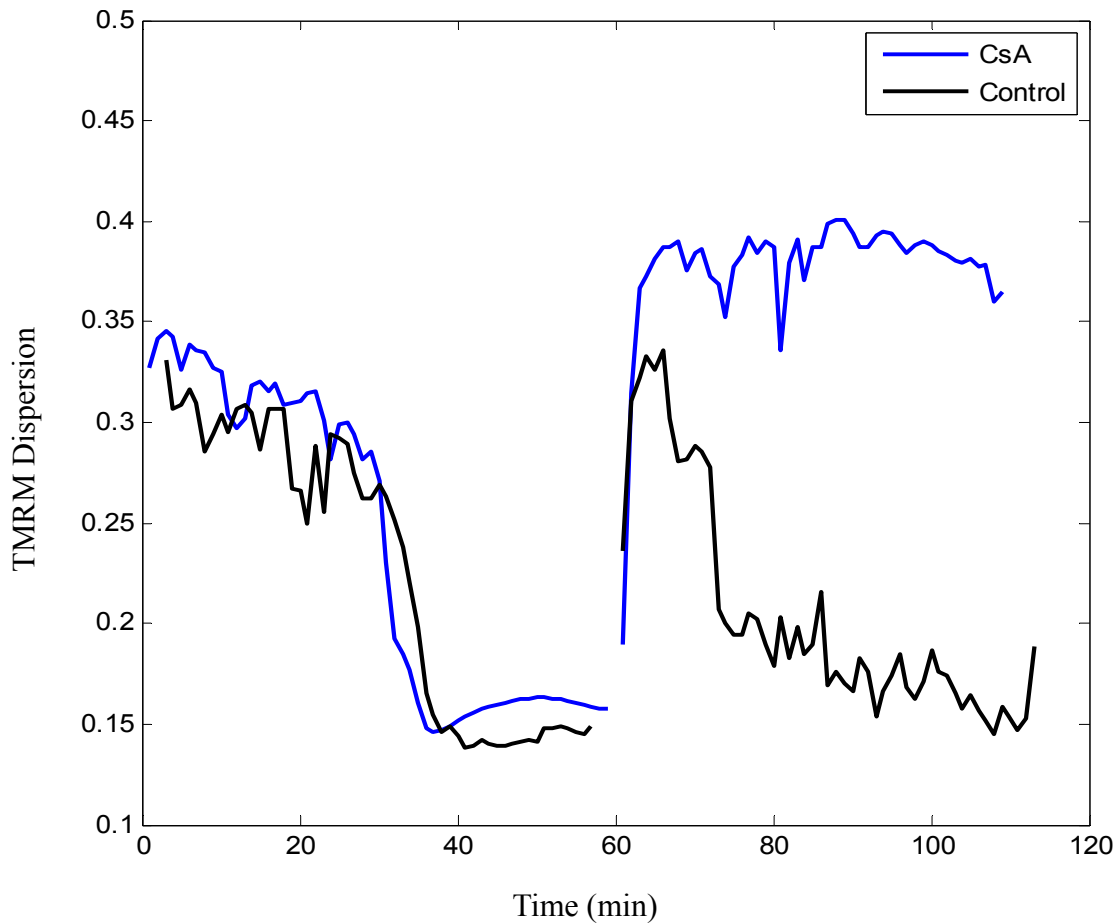

**Supplemental Figure 4. PTP involvement in large-scale reperfusion-induced mitochondrial  $\Delta\Psi_m$  loss.** While not able to prevent  $\Delta\Psi_m$  oscillations, CsA protected mitochondria from global depolarization. Both monolayers were from the same cell preparation; CsA was applied at 1  $\mu\text{mol/l}$ . Horizontal axis shows the time in minutes from the onset of ischemia. Reperfusion starts at 60 minutes.

## Supplementary Material

Solhjo and O'Rourke. Mitochondrial Instability during Regional Ischemia-Reperfusion Underlies Arrhythmias in Monolayers of Cardiomyocytes JMCC 2014

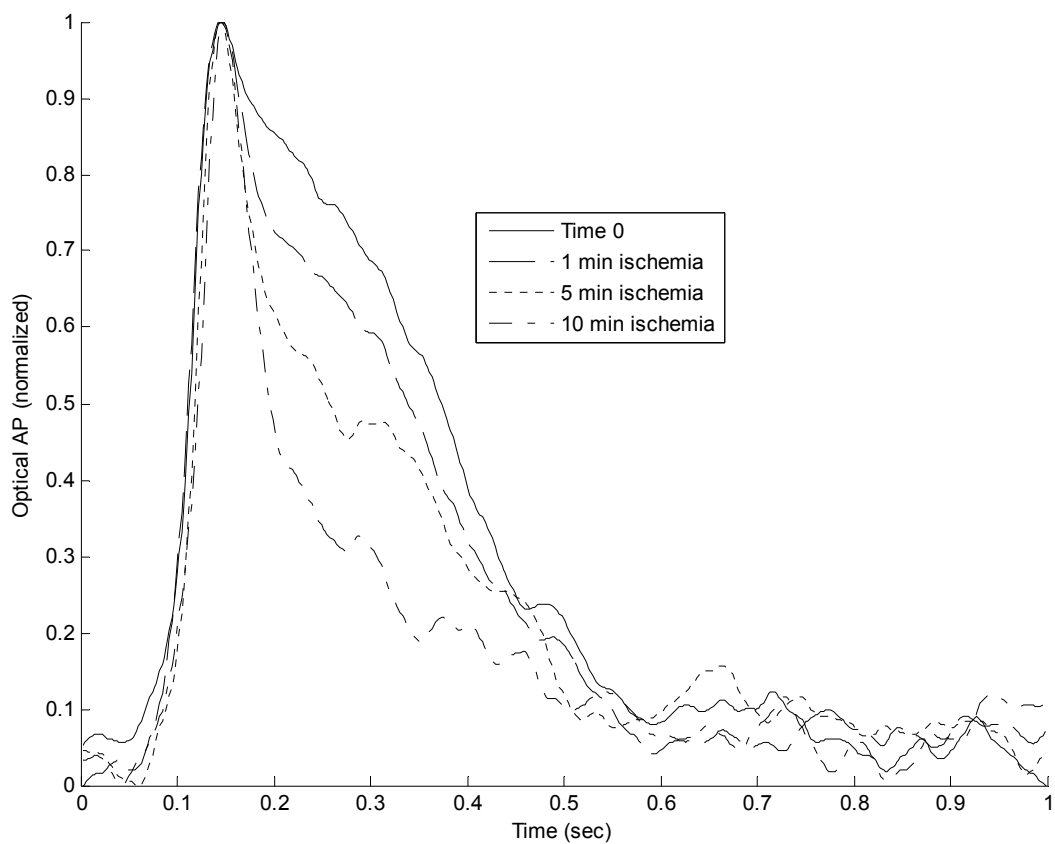

**Supplemental Figure 5. Optically measured action potential duration (APD) decreases during ischemia.** Action potential amplitude is normalized.

## Supplementary Material

Solhjo and O'Rourke. Mitochondrial Instability during Regional Ischemia-Reperfusion Underlies Arrhythmias in Monolayers of Cardiomyocytes JMCC 2014

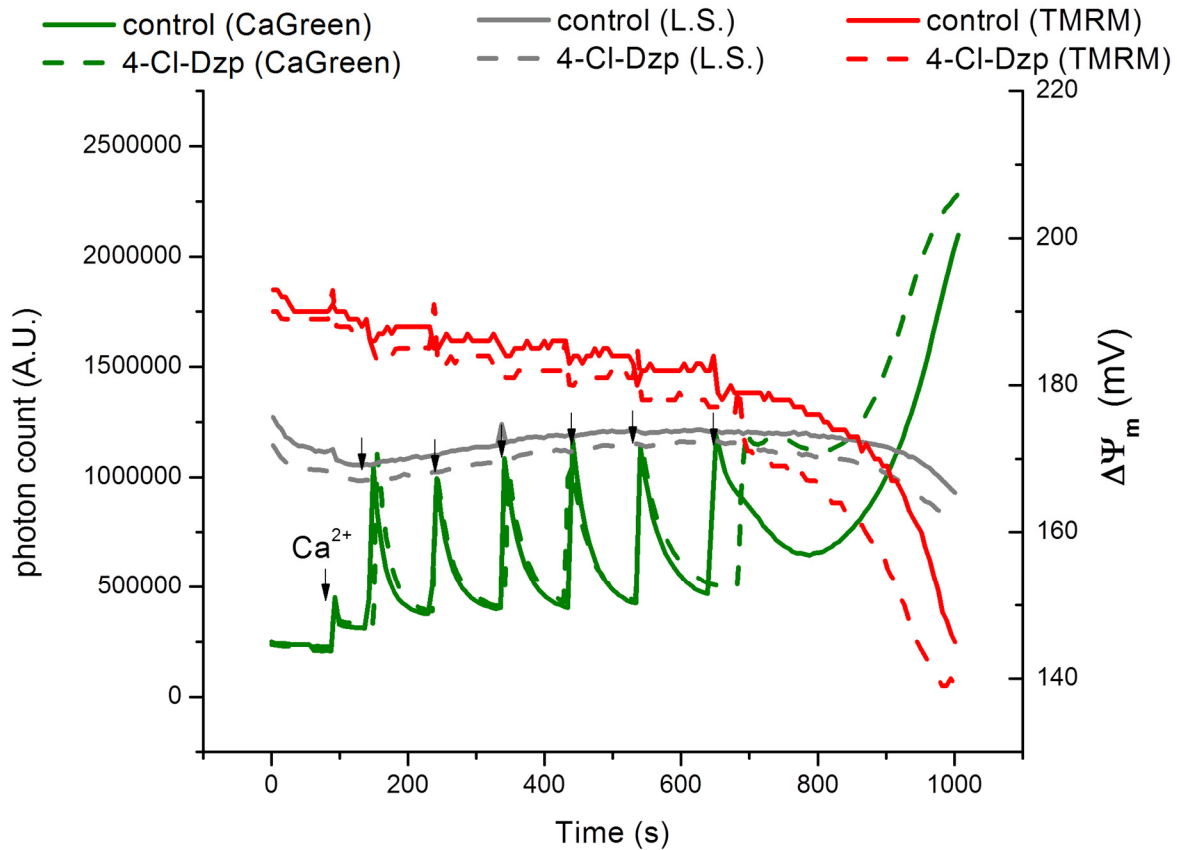

**Supplemental Figure 6. Lack of effect of 4'-Cl-DZP on Ca<sup>2+</sup> activation of PTP in isolated mitochondria from the adult rat heart.** Extra-mitochondrial Ca<sup>2+</sup>, measured with Calcium Green-5N (green);  $\Delta\Psi_m$ , measured ratiometrically with tetramethylrhodamine methyl ester (TMRM; red); and light scattering (L.S.; grey; 540 nm excitation) with 7 sequential additions of 5  $\mu$ M Ca<sup>2+</sup> in the absence (solid lines) or presence (dashed lines) of 16  $\mu$ M 4'-Cl-DZP. Methods were as described previously (Wei, et al, J Gen Physiol. 2012;139(6):465-78).

## Supplementary Material

Solhjo and O'Rourke. Mitochondrial Instability during Regional Ischemia-Reperfusion Underlies Arrhythmias in Monolayers of Cardiomyocytes JMCC 2014

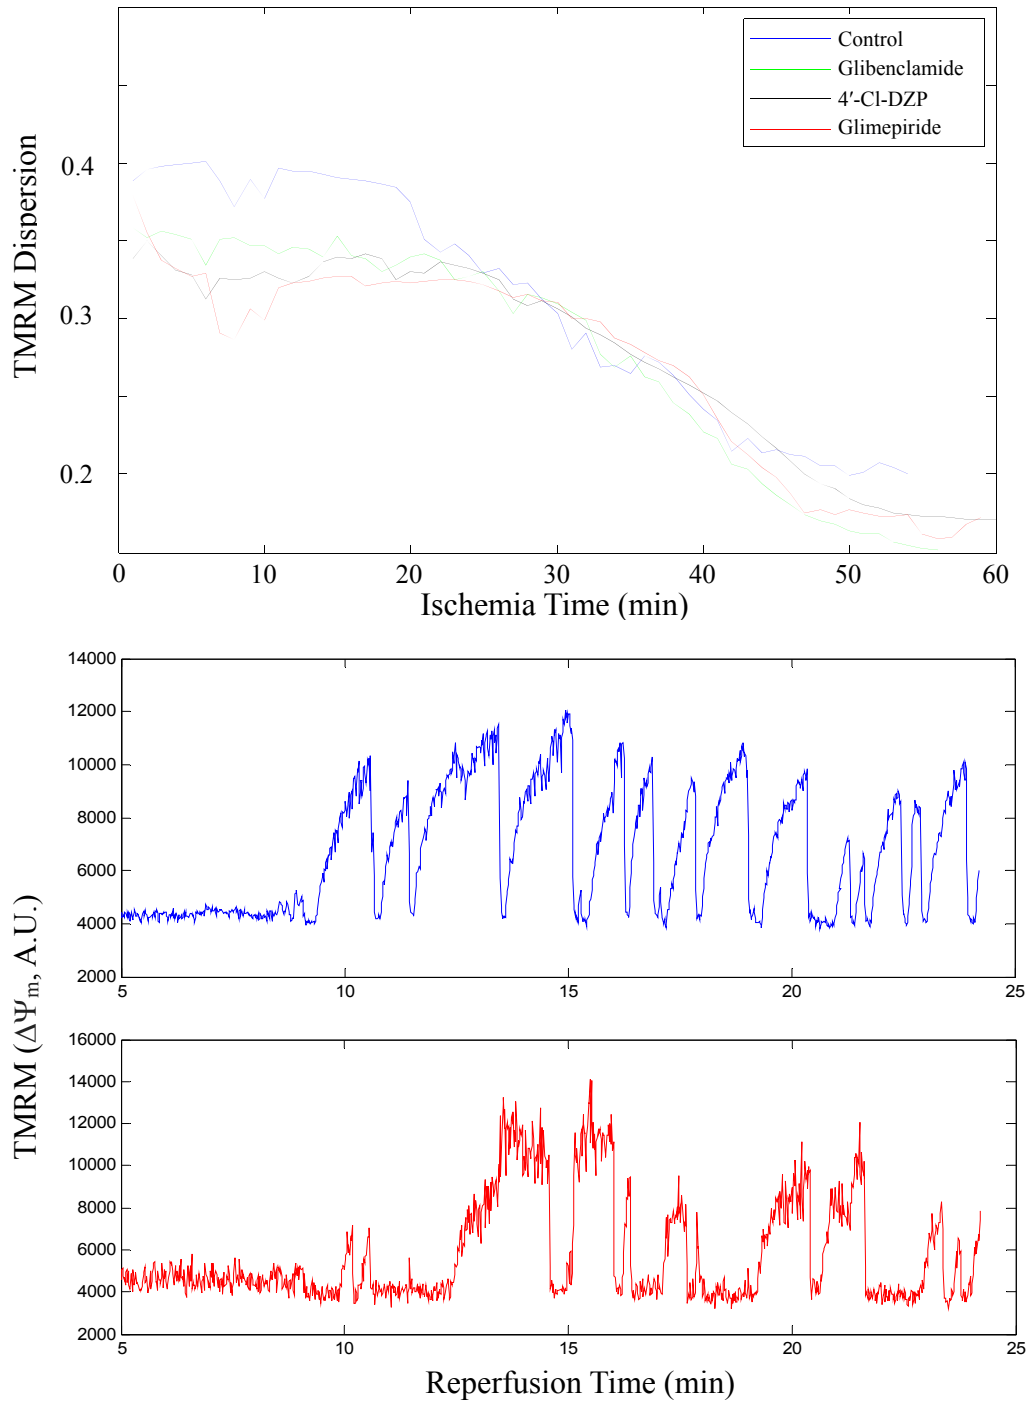

**Supplemental Figure 7. Effect of  $K_{ATP}$  inhibition on mitochondria during coverslip ischemia/reperfusion. Upper panel:**  $K_{ATP}$  inhibition did not affect the rate of coverslip ischemia-induced mitochondrial depolarization. A trend towards delayed phase 2  $\Delta\Psi_m$  loss during ischemia was observed with 4'-Cl-DZP treatment (see manuscript text for summary data) but did not reach statistical significance. **Lower panels:** Examples of reperfusion-induced  $\Delta\Psi_m$  oscillation in 2 adjacent mitochondrial clusters in presence of glimpiride 1  $\mu\text{mol/l}$ .



**Supplementary Material**

*Solhjo and O'Rourke. Mitochondrial Instability during Regional Ischemia-Reperfusion Underlies Arrhythmias in Monolayers of Cardiomyocytes JMCC 2014*

(A) Control

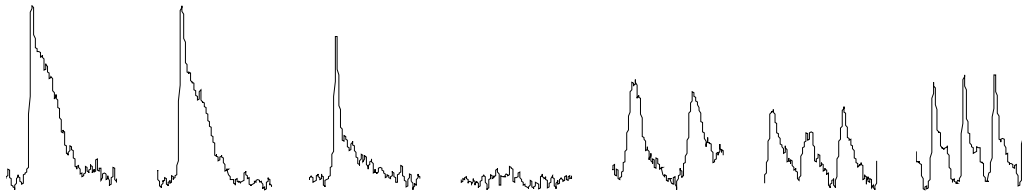

(B) Glibenclamide 10  $\mu\text{mol/l}$

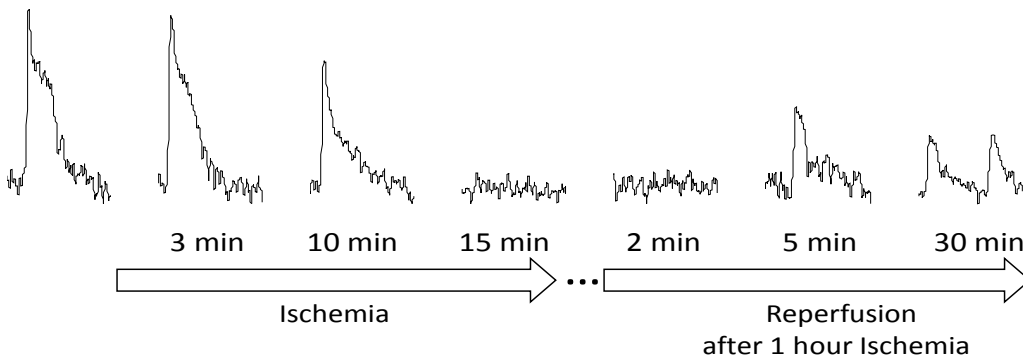

**Supplemental Figure 8. Effect of  $K_{ATP}$  inhibition on AP during IR.** During ischemia, AP is lost similar to control. However, APD shortening is slightly inhibited. Recovery is slowed but reentrant waves still form on reperfusion.

**Supplementary Material**

*Solhjo and O'Rourke. Mitochondrial Instability during Regional Ischemia-Reperfusion Underlies Arrhythmias in Monolayers of Cardiomyocytes JMCC 2014*

**Supplementary Table. Effect of coverslip-induced ischemia on electrophysiology of NRVM monolayers.** The data is shown as mean  $\pm$  standard deviation.

|                                                 | <b>Control</b>             | <b>4' CI-DZP</b>  |
|-------------------------------------------------|----------------------------|-------------------|
| <b>APD Before Ischemia (msec)</b>               | 138 $\pm$ 54               | 152 $\pm$ 58      |
| <b>CV Before Ischemia (cm/sec)</b>              | 15.5 $\pm$ 6.1             | 14.38 $\pm$ 3.32  |
| <b>APA Decrease after 5 min of Ischemia (%)</b> | 77 $\pm$ 25                | 73 $\pm$ 13       |
| <b>APD Decrease after 5 min of Ischemia (%)</b> | 57.9 $\pm$ 30.8            | 59.7 $\pm$ 20.5   |
| <b>CV after 5 min of Ischemia(cm/sec)</b>       | 8.3 $\pm$ 4.4 <sup>†</sup> | 14.16 $\pm$ 6.74* |
| <b>Time to Inexcitability (min)</b>             | 15.4 $\pm$ 5.4             | 13.1 $\pm$ 5      |

\* $P < 0.05$  versus control, <sup>†</sup>  $P < 0.05$  CV at 5min ischemia vs. before ischemia
